# Supplementary material for: Bio-inspired micro area concentrated array assisted perovskite photodetector toward weak light imaging
Source: Royal Society of Chemistry journal article supplement (doi:10.1039/d2tc03760b), 2022-11-01
Supplement: d2tc03760b1.pdf [file d2tc03760b1.pdf]

## Supporting Information

### **Bio-inspired Micro Area Concentrated Array Assisted Perovskite Photodetector toward Weak Light Imaging**

*Lutong Guo*<sup>[1,2]</sup>, *Kun Zhang*<sup>[1,2]</sup>, *Mingquan Tao*<sup>[1,2]</sup>, *Rudai Zhao*<sup>[1]</sup>, *Tingqing Wu*<sup>[1,2]</sup>, *Yang Wang*<sup>\*[1,2]</sup> and *Yanlin Song*<sup>\* [1,2]</sup>

[1] Key Laboratory of Green Printing, Institute of Chemistry, Chinese Academy of Sciences, Beijing National Laboratory for Molecular Sciences, CAS Research/Education Center for Excellence in Molecular Sciences, Zhongguancun North First Street 2, 100190 Beijing (P. R. China)

[2] School of Chemical Science, University of Chinese Academy of Sciences, 100190 Beijing (P. R. China)

E-mail: wangyang@iccas.ac.cn; ylsong@iccas.ac.cn

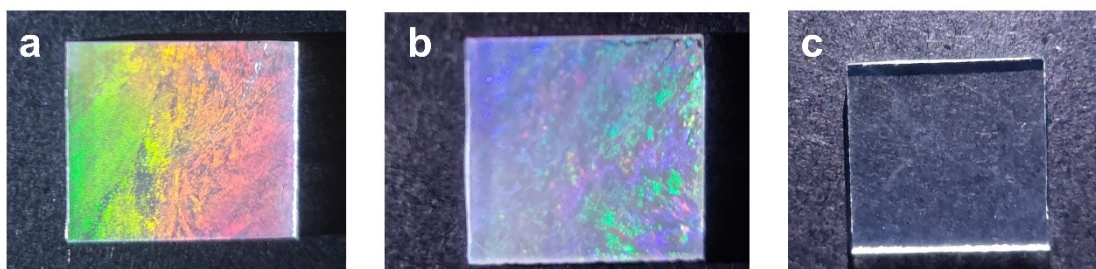

**Figure S1.** Photograph of (a) 600 nm-2D PC, (b) 900 nm-2D PC, (c) 180 nm-2D PC.

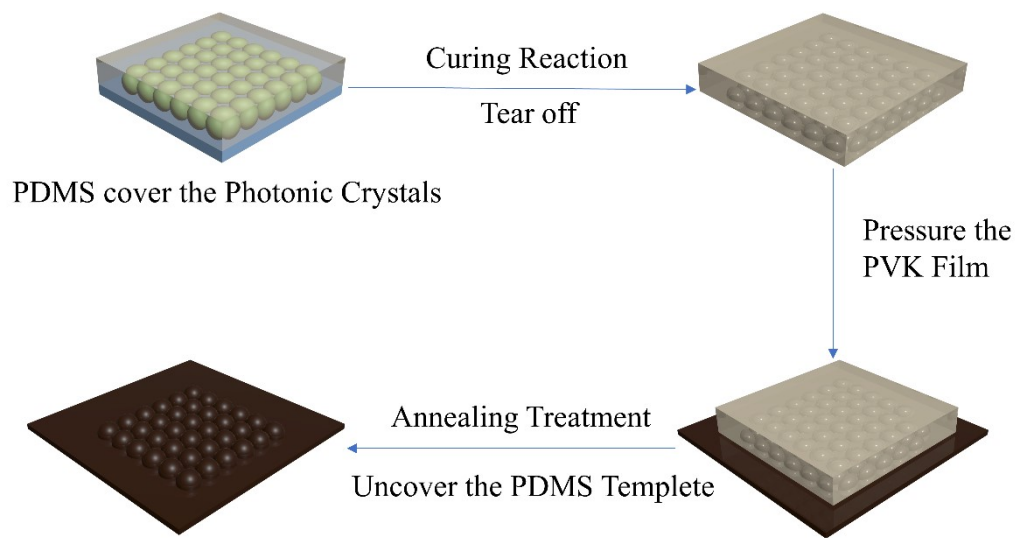

PVK Film with Concentrated Structure

**Figure S2.** The preparation of the bio-inspired micro area concentrated perovskite.

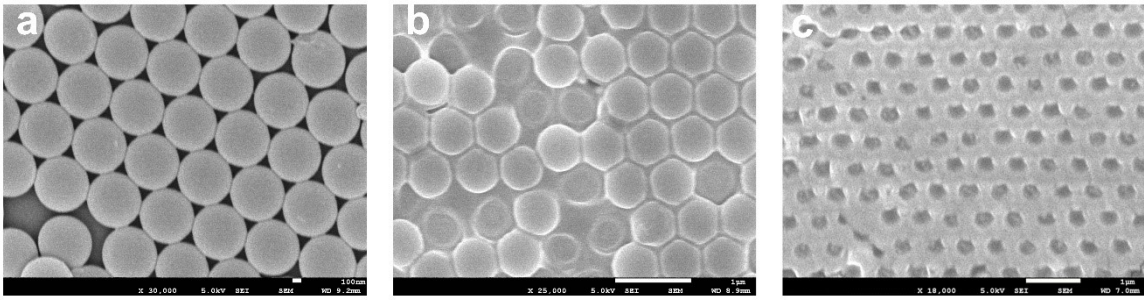

**Figure S3.** (a, b) SEM images of 600 nm-2D PC (a) before pouring PDMS and (b) after tearing off the PDMS bump stamp. (c) SEM images of 600 nm-PDMS bump stamp. Due to the force balance, the actual size of the hole is  $2/3$  of that of the ball.

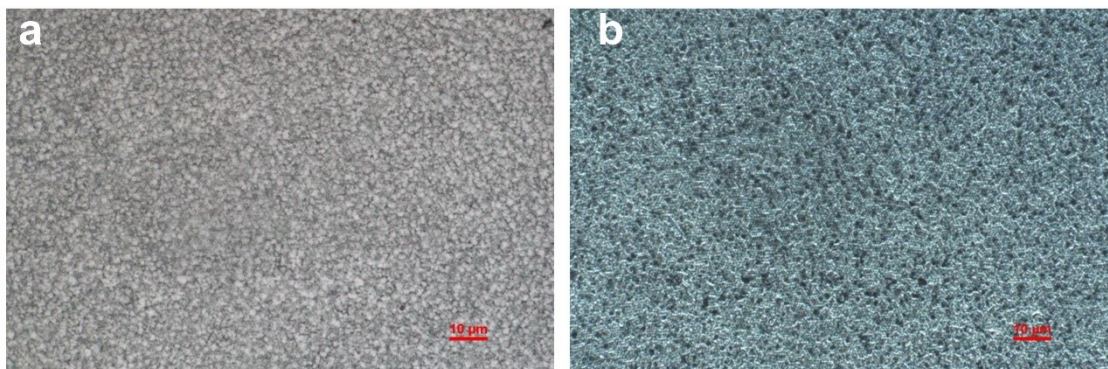

**Figure S4.** Optical microscopy of (a) brightfield and (b) darkfield photographs of the 600 nm-PVK.

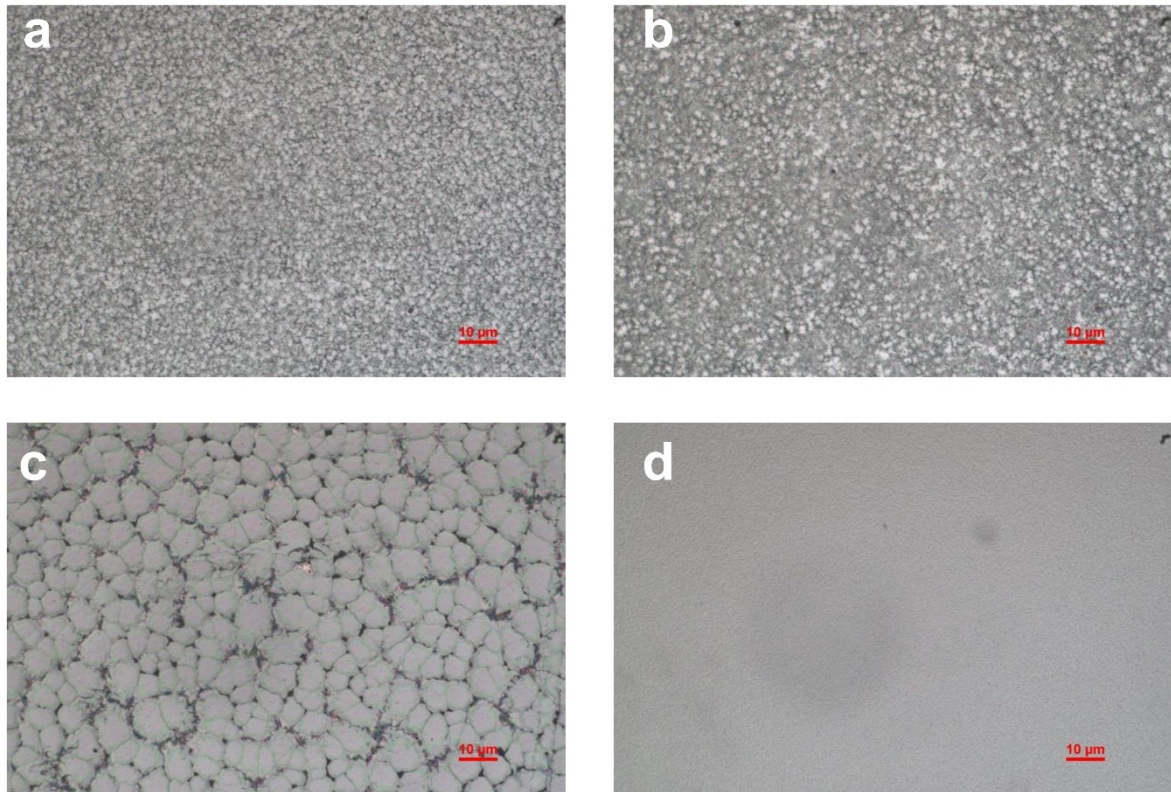

**Figure S5.** Optical microscopy brightfield photographs of (a) 600 nm-PVK, (b) 900 nm-PVK, (c) 180 nm-PVK and (d) Flat-PVK. Due to the small size of 180 nm, pressure-induced crystallization dominates and exhibits different crystallization behaviors.

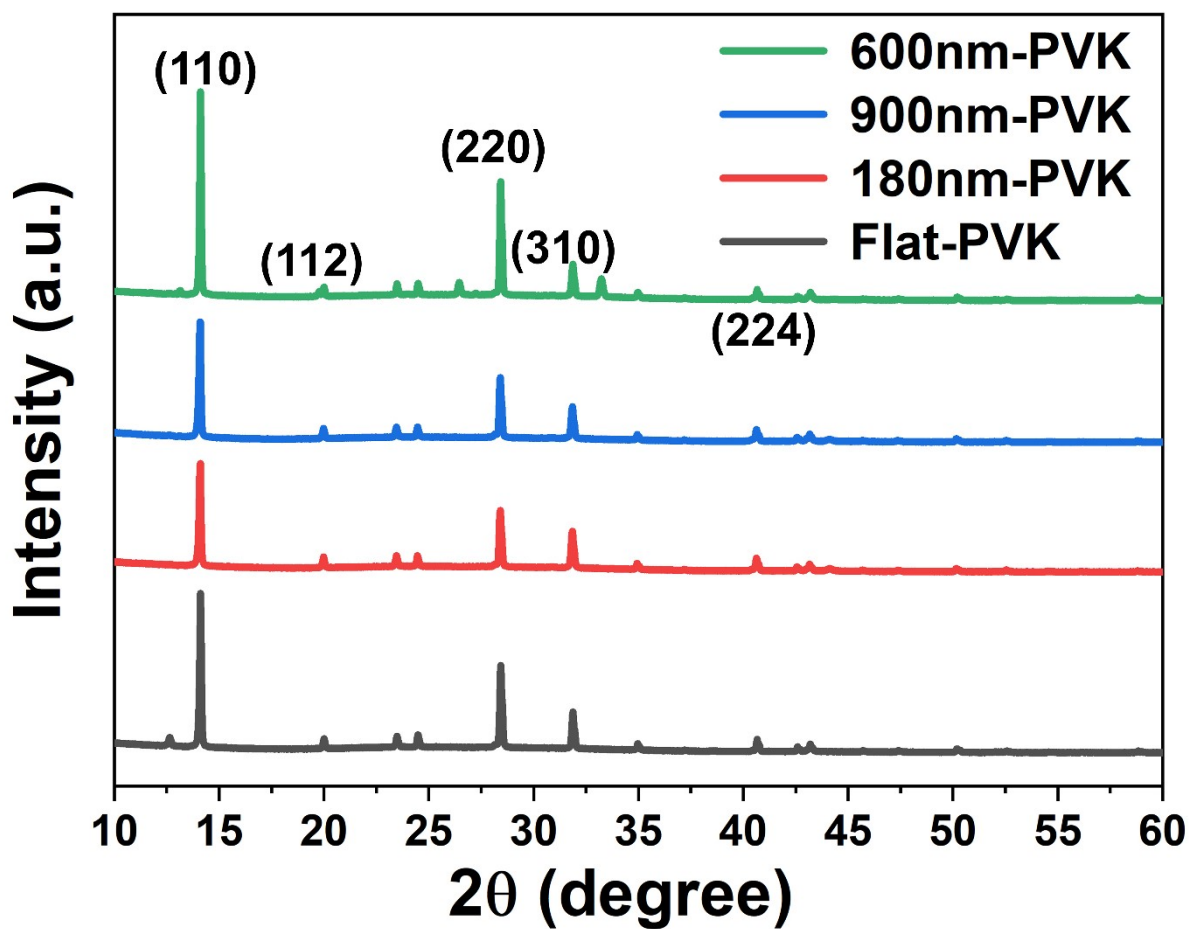

**Figure S6.** X-ray diffraction of 600 nm-PVK, 900 nm-PVK, 180 nm-PVK and Flat-PVK films. The XRD diffraction peaks of (110), (112), (220), (310), and (224) indicate that the samples have a pure tetragonal phase.

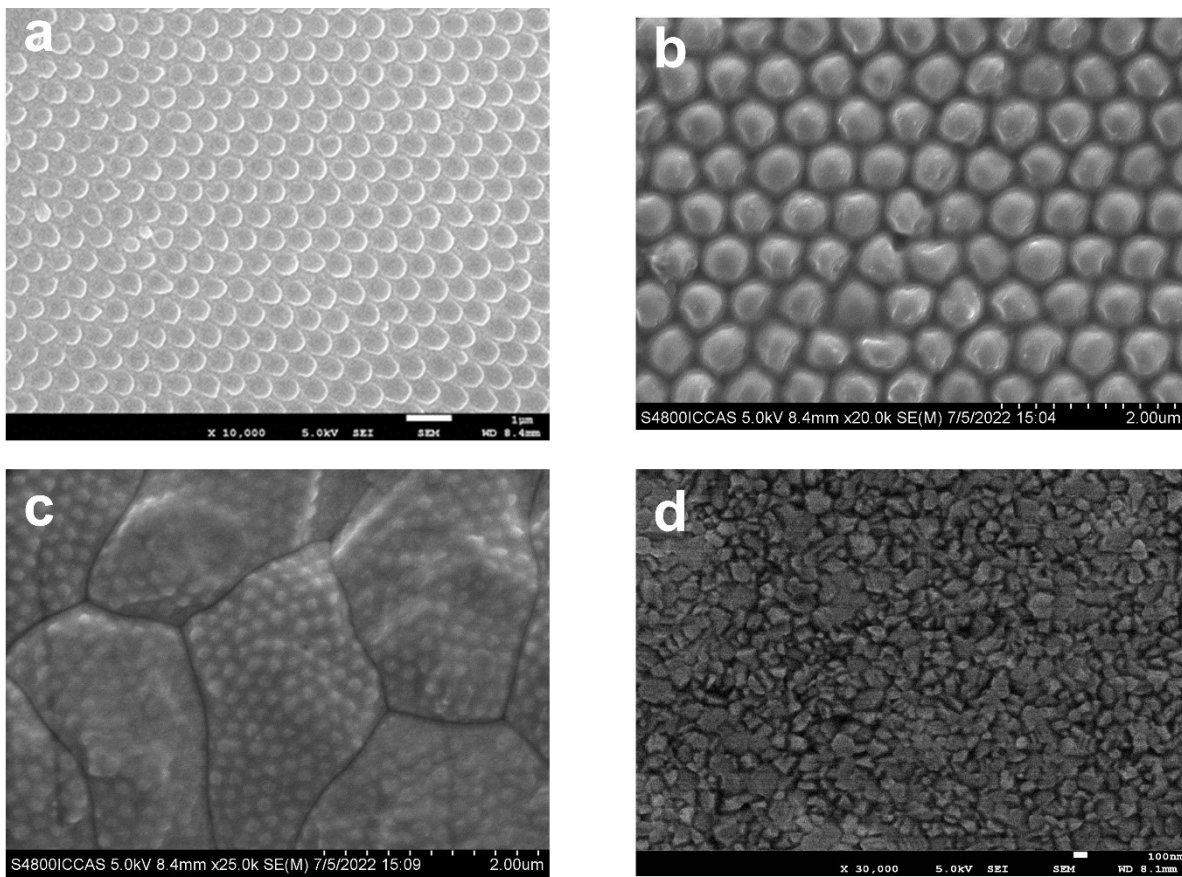

**Figure S7.** SEM images of (a) 600nm-PVK, (b) 900nm-PVK, (c) 180nm-PVK and (d) Flat-PVK. These results are consistent with optical microscopy results.

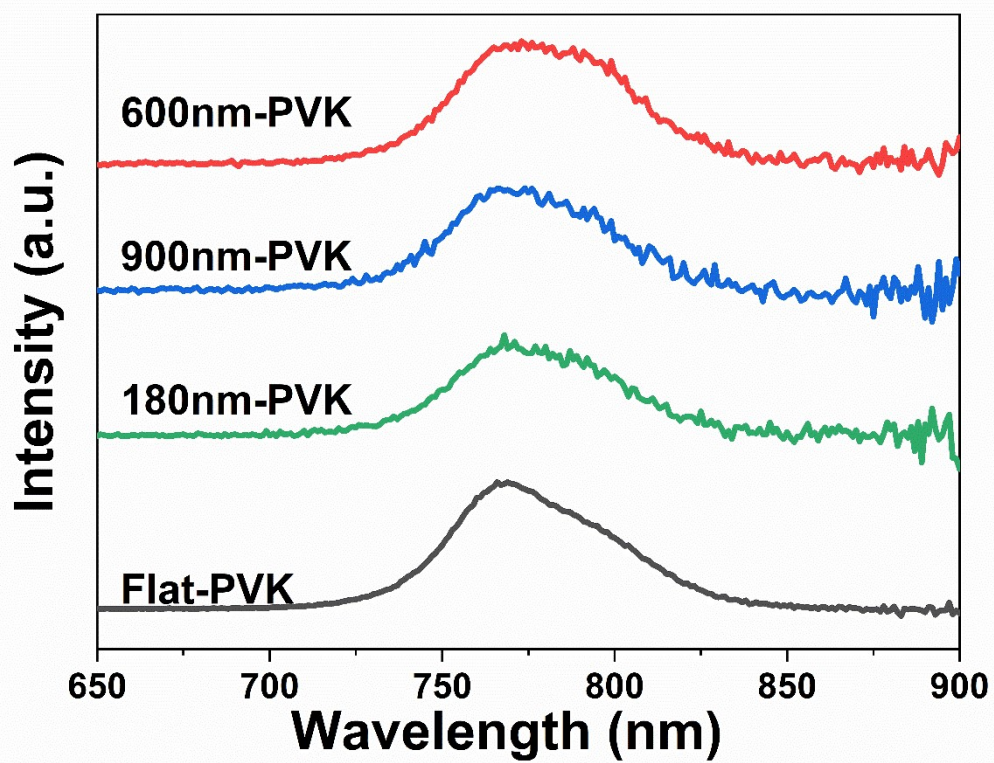

**Figure S8.** Steady-state photoluminescence of 600 nm-PVK, 900 nm-PVK, 180 nm-PVK and Flat-PVK films.



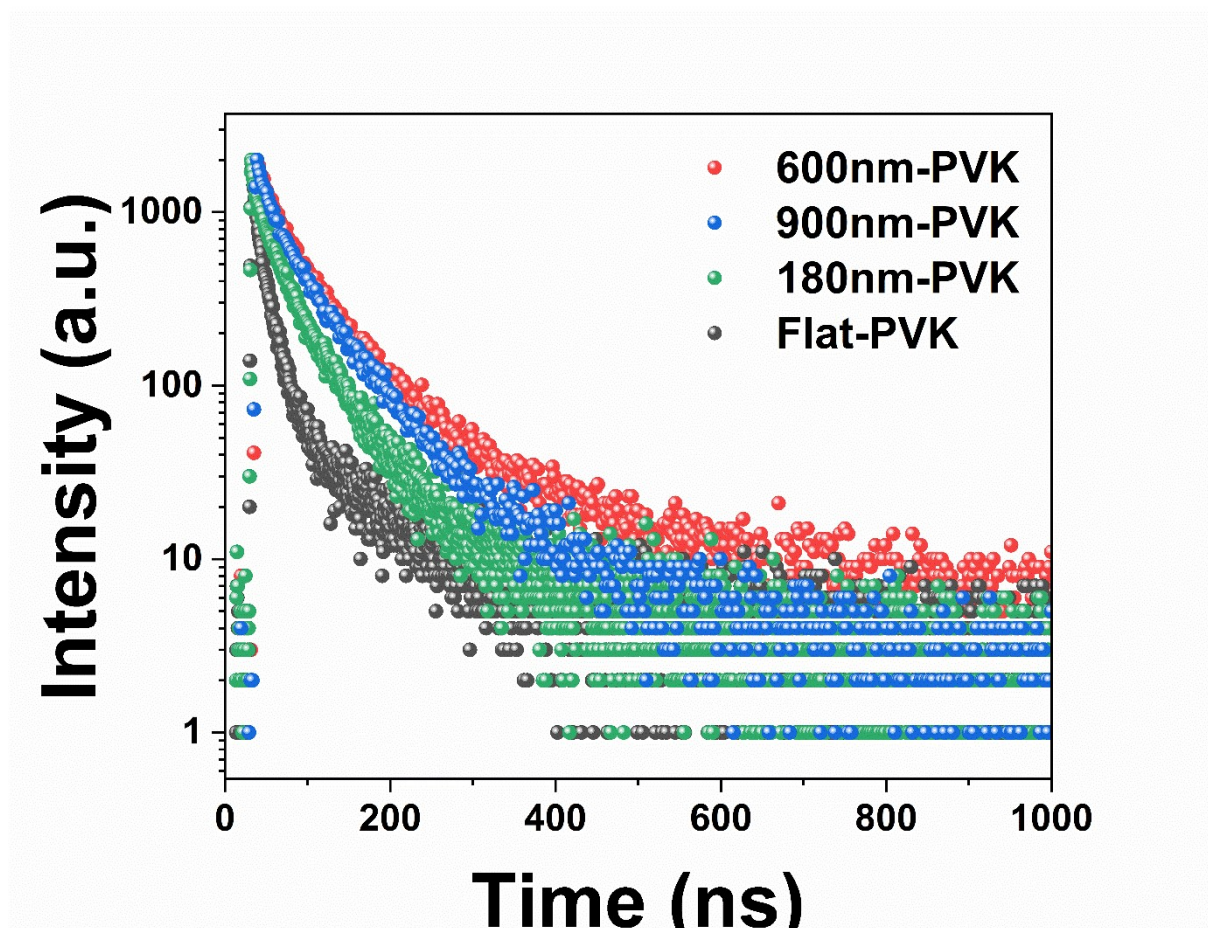

**Figure S9.** Time-resolved photoluminescence of 600 nm-PVK, 900 nm-PVK, 180 nm-PVK and Flat-PVK films, respectively. The 600nm-PVK film exhibits a minimum short-lived PL lifetime with nonradiative recombination and a maximum long-lived PL lifetime with radiative recombination

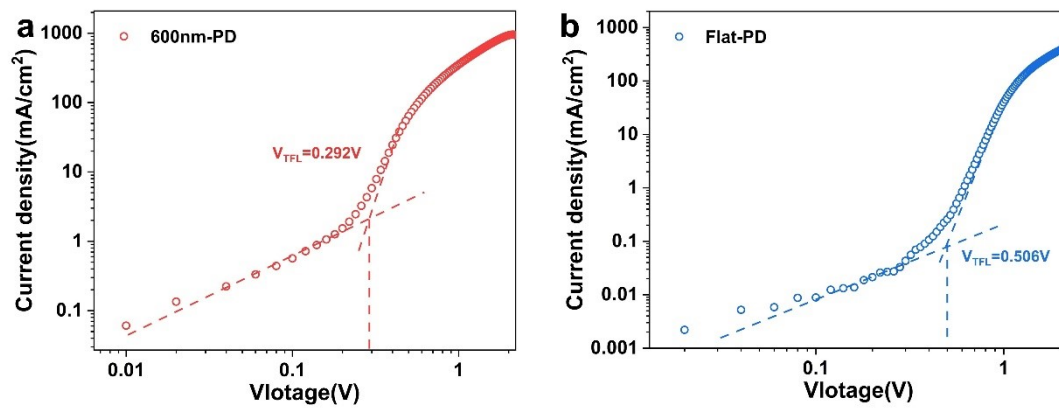

**Figure S10.** Current density-voltage characteristics of devices with FTO/perovskite /Au: (a) 600 nm-PD and (b) Flat-PD.

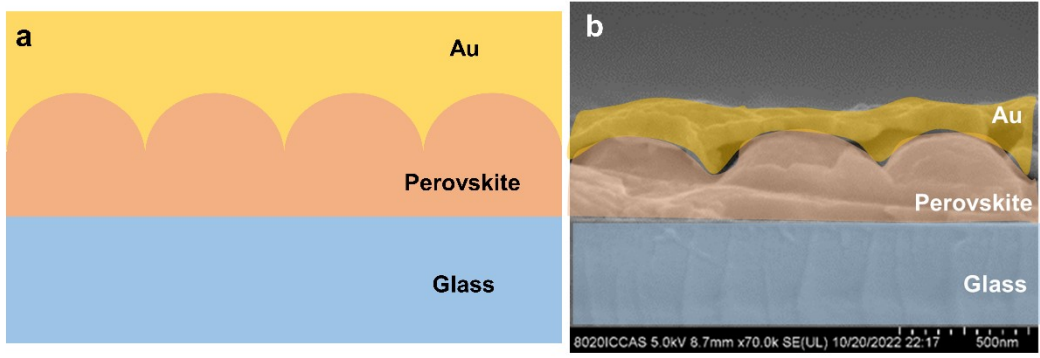

**Figure S11.** Diagram (a) and cross-sectional SEM image (b) of 600nm-PD device

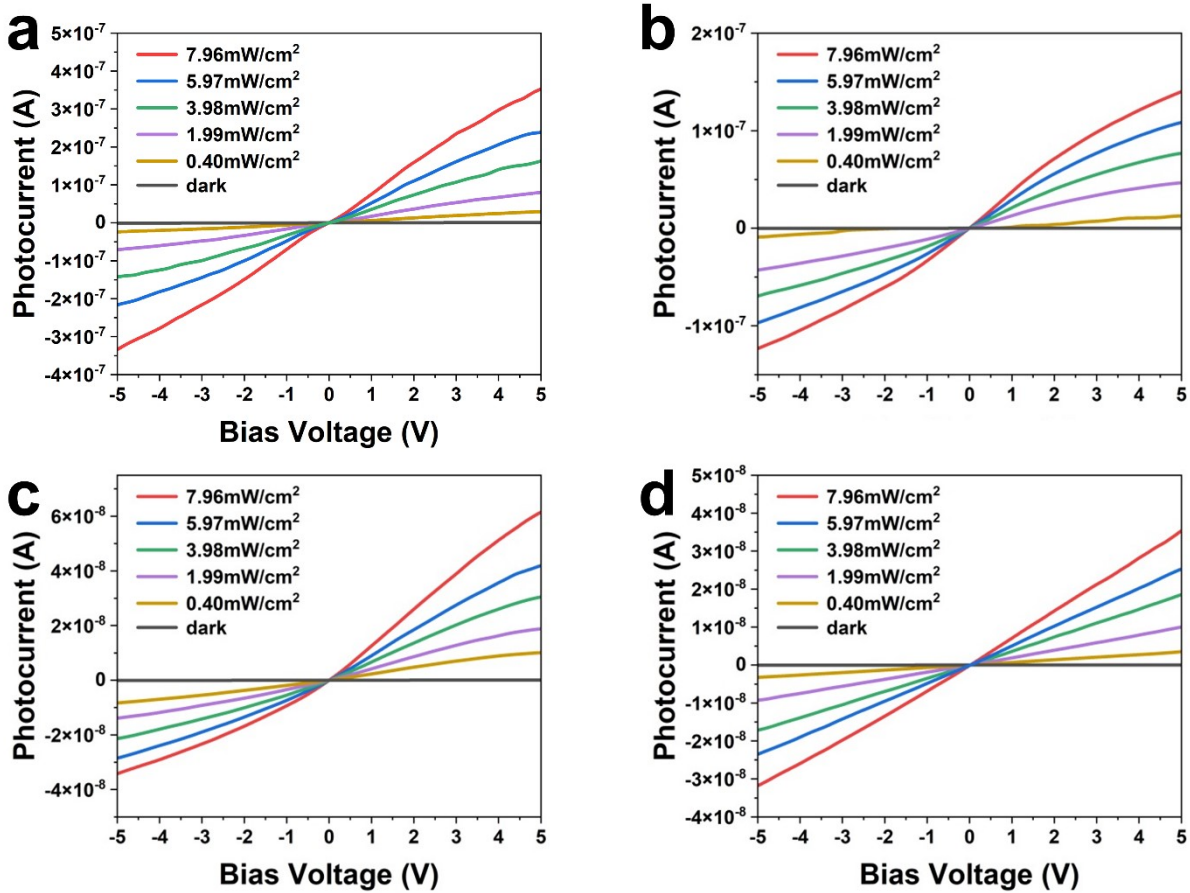

**Figure S12.** Photoelectric properties of perovskite photodetector. I-V curves of a) 600 nm-PD, b) 900 nm-PD, c) 180 nm-PD and d) Flat-PD in dark and under different light intensity, 650 nm light illumination at 5 V bias.

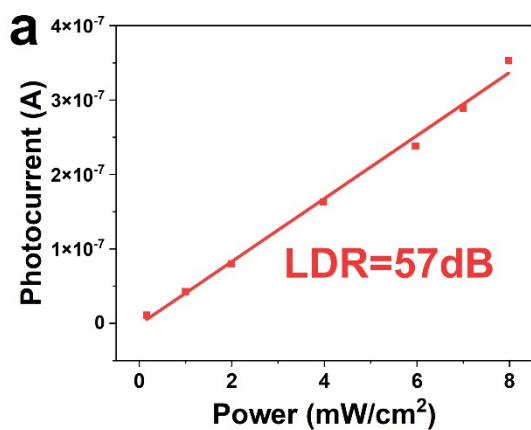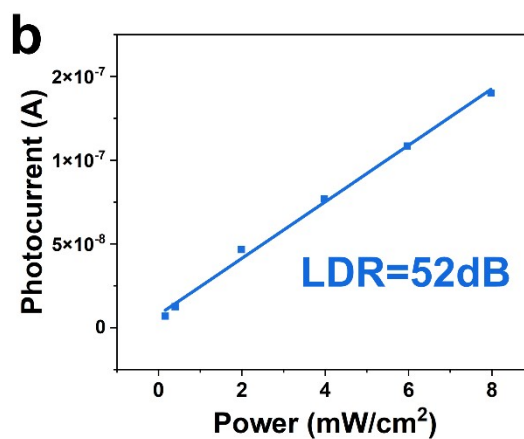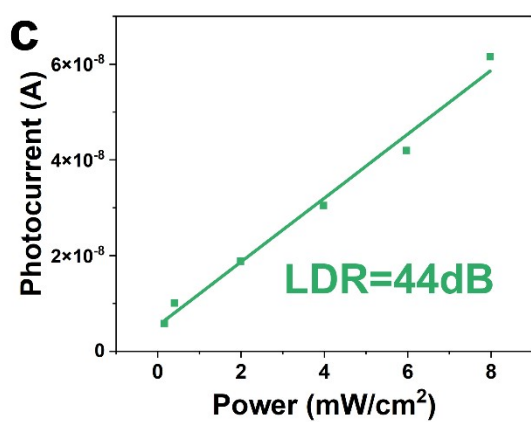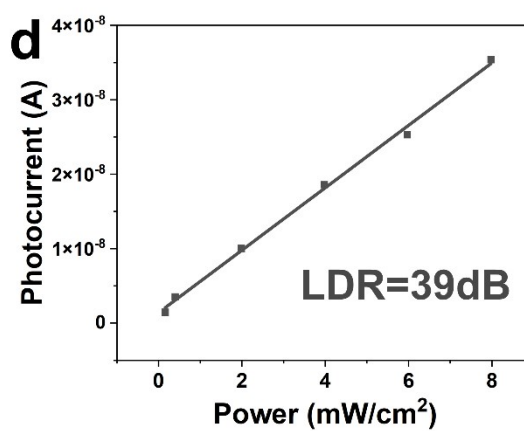

**Figure S13.** LDR of (a) 600 nm-PD, (b) 900 nm-PD, (c) 180 nm-PD and (d) Flat-PD at 5 V bias. 600 nm-PD has better photostability.

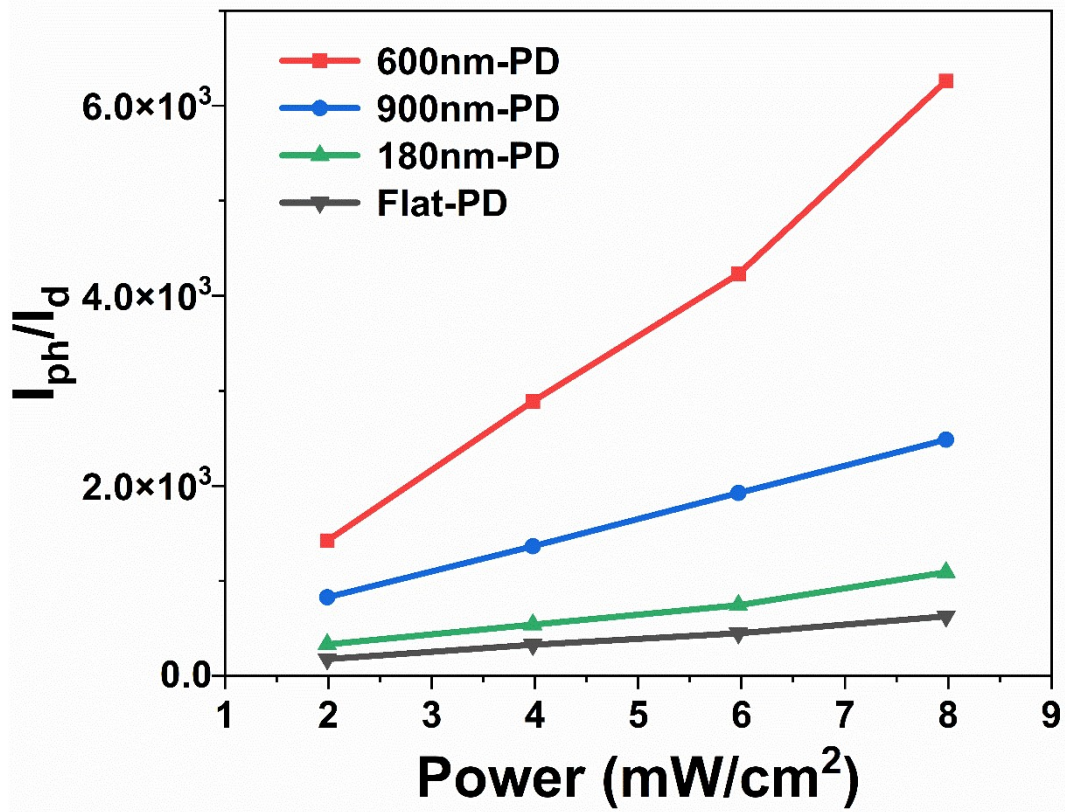

**Figure S14.** On/off ratio calculation of 600 nm-PD, 900 nm-PD, 180 nm-PD and Flat-PD at different incident light power.

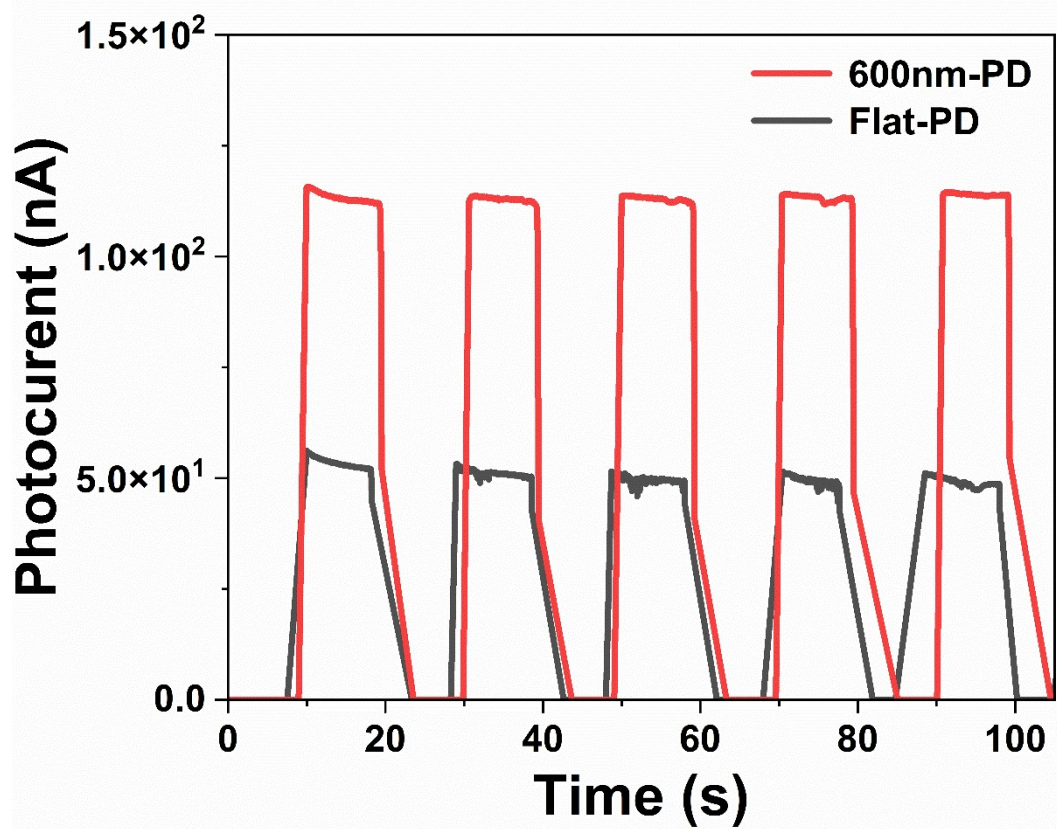

**Figure S15.** I-t curves of 600 nm-PD and Flat-PD in dark and under white light illumination at 5 V bias.

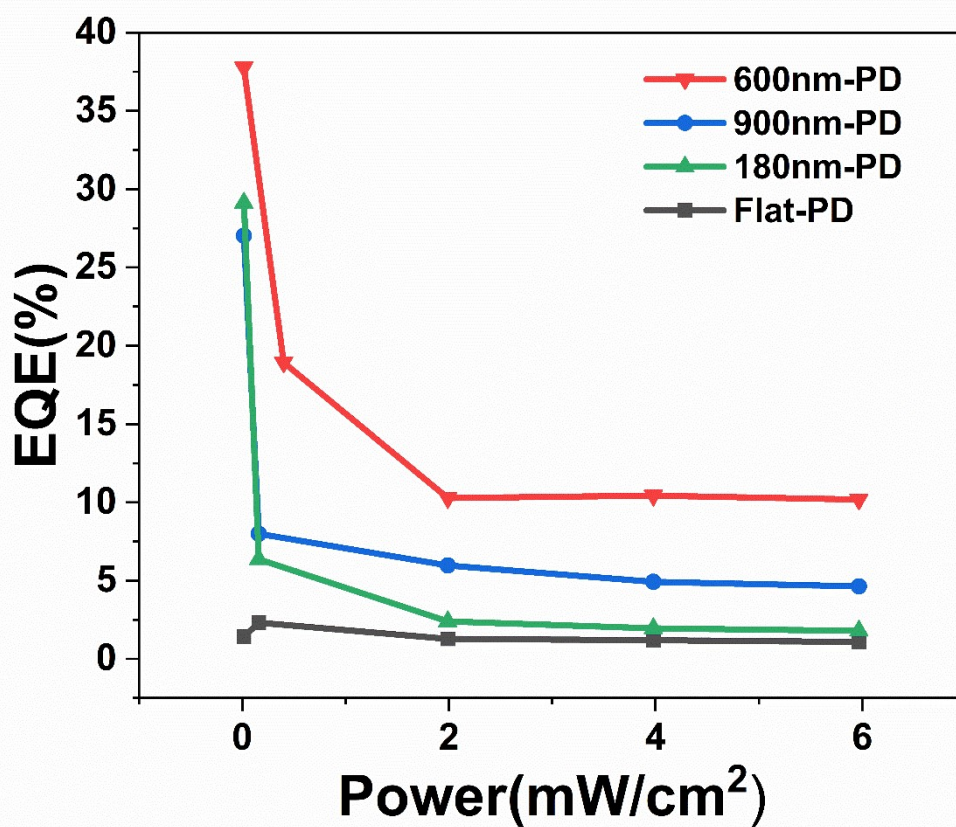

**Figure S16.** External quantum efficiency (EQE) of 600 nm-PD, 900 nm-PD, 180 nm-PD and Flat-PD at different incident light power.



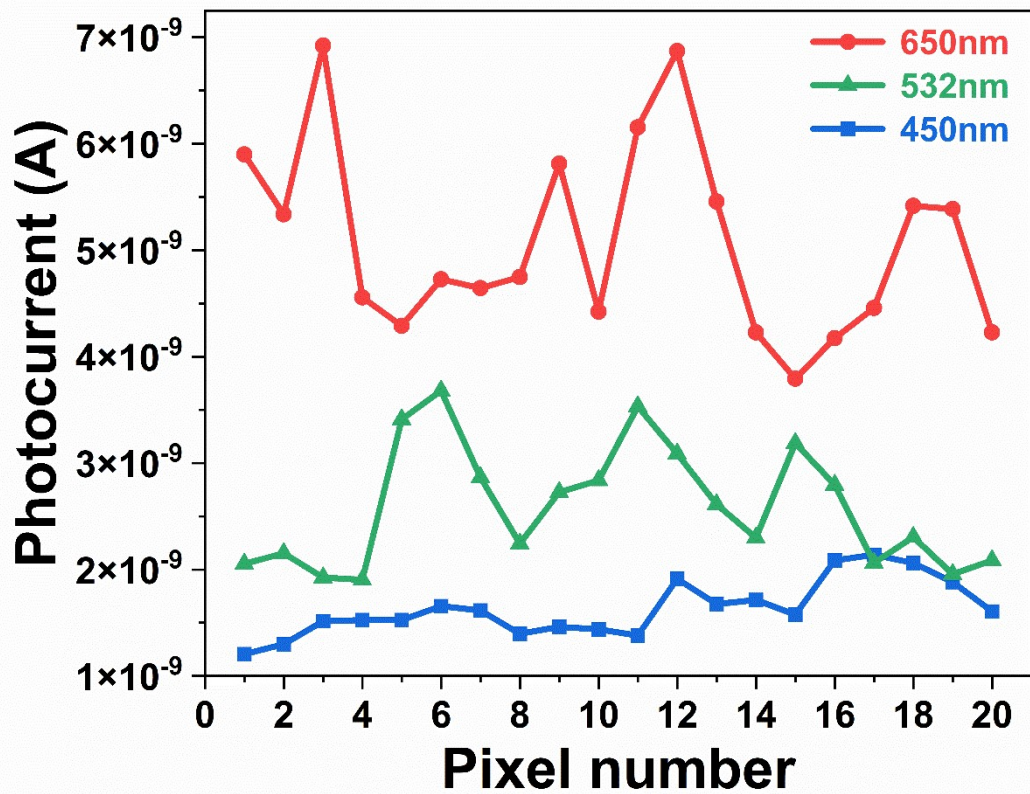

**Figure S17.** Photocurrent for 20 pixels of 600 nm-PD under the wavelength of 650 nm, 532 nm and 450 nm, respectively.

**Table S1.** Time-resolved photoluminescence of 600nm-PVK, 900nm-PVK, 180nm-PVK and Flat-PVK films.

| Samples   | T1<br>[ns] | T2<br>[ns] |
|-----------|------------|------------|
| 600nm-PVK | 47         | 258        |
| 900nm-PVK | 79         | 214        |
| 180nm-PVK | 67         | 179        |
| Flat-PVK  | 42         | 140        |

**Table S2.** Comparison of the key parameters for MAPbI<sub>3</sub> based photodetectors.

| Device structure            | Detection condition                        | Perovskite structure | Responsivity [A W <sup>-1</sup> ] | Detectivity [Jones]   | On/off ratio    | Ref.      |
|-----------------------------|--------------------------------------------|----------------------|-----------------------------------|-----------------------|-----------------|-----------|
| Au/MAPbI <sub>3</sub> /Au   | 5V, 16μW cm <sup>-2</sup> , 650nm light    | Microsphere array    | 0.2                               | 1.37×10 <sup>13</sup> | 10 <sup>4</sup> | This work |
| Au/MAPbI <sub>3</sub> /Au   | 10V, 100μW cm <sup>-2</sup> , 650nm light  | Nanowires            | 0.1                               | 10 <sup>12</sup>      | -               | [1]       |
| Au/MAPbI <sub>3</sub> /Au   | 30V, 80μW cm <sup>-2</sup> , 650nm light   | Nanowires            | 1.3                               | 2.5×10 <sup>12</sup>  | 23              | [2]       |
| ITO/MAPbI <sub>3</sub> /ITO | 10V, 100μW cm <sup>-2</sup> , 650nm light  | Microwires           | 1.2                               | 2.39×10 <sup>12</sup> | 10 <sup>4</sup> | [3]       |
| Au/MAPbI <sub>3</sub> /Au   | White light                                | Nanonet              | 0.59                              | -                     | 10 <sup>5</sup> | [4]       |
| Au/MAPbI <sub>3</sub> /Au   | 0V, 650nm light                            | Nanowires            | 0.0125                            | 7.3×10 <sup>12</sup>  | 10 <sup>5</sup> | [5]       |
| Au/MAPbI <sub>3</sub> /Au   | 4V, 50μW cm <sup>-2</sup> , 265nm light    | Nanoflakes           | 12                                | 10 <sup>11</sup>      | 10 <sup>4</sup> | [6]       |
| Au/MAPbI <sub>3</sub> /Au   | 2V, 38.5μW cm <sup>-2</sup> , 650nm light  | Nanoribbon           | 0.0389                            | 8.21×10 <sup>11</sup> | -               | [7]       |
| C/MAPbI <sub>3</sub> /CuO   | 550nm light                                | -                    | 0.3717                            | 1.65×10 <sup>13</sup> | 371.7           | [8]       |
| Au/MAPbI <sub>3</sub> /Au   | 1V, 10μW cm <sup>-2</sup> , white light    | Films                | 0.418                             | 1.22×10 <sup>13</sup> | -               | [9]       |
| Au/MAPbI <sub>3</sub> /Au   | 1V, 1μW cm <sup>-2</sup> , 466/635nm light | Nanograting          | 3.23/6.2                          | -                     | 10 <sup>3</sup> | [10]      |

#### Reference

- [1] H. Deng, X. K. Yang, D. D. Dong, B. Li, D. Yang, S. J. Yuan, K. K. Qiao, Y. B. Cheng, J. Tang, H. S. Song, *Nano Lett.*, 2015, **15**, 7963-7969.
- [2] H. Deng, D. D. Dong, K. K. Qiao, L. L. Bu, B. Li, D. Yang, H. E. Wang, Y. B. Cheng, Z. X. Zhao, J. Tang, H. S. Song, *Nanoscale*, 2015, **7**, 4163-4170.
- [3] Y. Liu, F. Li, C. Perumal Veeramalai, W. Chen, T. Guo, C. Wu, T. W. Kim, *ACS Appl. Mater. Interfaces*, 2017, **9**, 11662-11668.
- [4] W. H. Wang, Y. R. Ma, L. M. Qi, *Adv. Funct. Mater.*, 2017, **27**, 1603653.
- [5] F. R. Cao, W. Tian, M. Wang, H. P. Cao, L. Li, *Adv. Funct. Mater.*, 2019, **29**, 1901280.
- [6] W. Zheng, R. Lin, Z. Zhang, Q. Liao, J. Liu, F. Huang, *Nanoscale*, 2017, **9**, 12718-12726.
- [7] S. Lim, M. Ha, Y. Lee, H. Ko, *Adv. Opt. Mater.* 2018, **6**, 1800615.

- [8] H. Sun, W. Tian, F. Cao, J. Xiong, L. Li, *Adv. Mater.*, 2018, **30**, 1706986.
- [9] S. F. Leung, K. T. Ho, P. K. Kung, V. K. Hsiao, H. N. Alshareef, Z. L. Wang, J. H. He, *Adv. Mater.*, 2018, **30**, 1704611.
- [10] H. Wang, R. Haroldson, B. Balachandran, A. Zakhidov, S. Sohal, J. Y. Chan, A. Zakhidov, W. Hu, *ACS Nano*, 2016, **10**, 10921-10928.
